# Supplementary material for: STR-typing of ancient skeletal remains: which multiplex-PCR kit is the best?
Source: PubMed Central journal article supplement (PMC3494155; doi:10.3325/cmj.2012.53.416), 2012-10
Supplement: CroatMedJ_53_s012.pdf [file CroatMedJ_53_s012.pdf]

|            | Promega<br>(Injection time ABI 3130: 3 kW, 3 sec) |                     |                     |                     |                     | Applied Biosystems<br>(Injection time ABI 3130: 3 kW, 3 sec) |             |             |
|------------|---------------------------------------------------|---------------------|---------------------|---------------------|---------------------|--------------------------------------------------------------|-------------|-------------|
|            |                                                   | ESX                 | PPL16/HS            | ES                  | S5                  | SE                                                           | ID          | NGM         |
| Amelogenin | Fluorescein 80-90                                 | Fluorescein 80-90   | TMR-ET 100-110      | TMR-ET 100-110      | Fluorescein 80-110  | VIC 100-110                                                  | PET 100-110 | VIC 100-110 |
| D3S1358    | Fluorescein 90-150                                | Fluorescein 90-150  | Fluorescein 99-147  | Fluorescein 100-150 | /                   | FAM 90-140                                                   | VIC 97-145  | PET 115-165 |
| D19S433    | Fluorescein 150-220                               | CXR-ET 190-260      | /                   | /                   | /                   | NED 90-140                                                   | NED 92-150  | NED 120-160 |
| D2S1338    | Fluorescein 220-295                               | JOE 180-260         | /                   | /                   | /                   | FAM 277-345                                                  | VIC 291-359 | FAM 280-360 |
| D22S1045   | Fluorescein 295-345                               | TMR-ET 50-120       | /                   | /                   | /                   | /                                                            | /           | NED 80-120  |
| D16S539    | JOE 50-130                                        | JOE 260-330         | JOE 260-308         | /                   | /                   | FAM 220-270                                                  | VIC 250-296 | FAM 220-280 |
| D18S51     | JOE 130-210                                       | Fluorescein 270-370 | Fluorescein 280-360 | Fluorescein 270-370 | Fluorescein 110-200 | PET 265-335                                                  | NED 264-351 | VIC 260-350 |
| D1S1656    | JOE 210-275                                       | JOE 125-180         | /                   | /                   | /                   | /                                                            | /           | PET 170-220 |
| D10S1248   | JOE 275-330                                       | JOE 50-125          | /                   | /                   | /                   | /                                                            | /           | FAM 70-120  |
| D2S441     | JOE 330-380                                       | CXR-ET 60-125       | /                   | /                   | /                   | /                                                            | /           | PET 80-115  |
| TH01       | TMR-ET 40-125                                     | Fluorescein 150-195 | Fluorescein 152-196 | Fluorescein 150-195 | JOE 80-135          | NED 155-200                                                  | VIC 160-210 | NED 170-220 |
| VWA        | TMR-ET 120-195                                    | TMR-ET 120-200      | TMR-ET 123-183      | TMR-ET 120-180      | /                   | FAM 140-210                                                  | NED 152-210 | FAM 150-200 |
| D21S11     | TMR-ET 195-270                                    | Fluorescein 195-270 | Fluorescein 155-273 | Fluorescein 195-260 | /                   | PET 180-250                                                  | FAM 175-256 | VIC 180-250 |
| D12S391    | TMR-ET 270-350                                    | CXR-ET 125-190      | /                   | /                   | /                   | /                                                            | /           | PET 220-290 |
| D8S1179    | CXR-ET 50-140                                     | TMR-ET 200-260      | TMR-ET 200-250      | TMR-ET 200-250      | Fluorescein 200-300 | VIC 124-170                                                  | FAM 123-175 | VIC 120-180 |
| FGA        | CXR-ET 140-300                                    | TMR-ET 260-420      | TMR-ET 308-464      | TMR-ET 305-465      | JOE 135-300         | NED 200-360                                                  | PET 196-352 | NED 230-360 |
| SE33       | CXR-ET 300-500                                    | CXR-ET 260-460      | /                   | JOE 195-330         | /                   | VIC 190-350                                                  | /           | /           |
| D7S820     | /                                                 | /                   | JOE 211-260         | /                   | /                   | /                                                            | FAM 256-300 | /           |
| CSF        | /                                                 | /                   | JOE 317-361         | /                   | /                   | /                                                            | FAM 300-350 | /           |
| D13S317    | /                                                 | /                   | JOE 160-205         | /                   | /                   | /                                                            | VIC 210-250 | /           |
| TPOX       | /                                                 | /                   | TMR-ET 254-302      | /                   | /                   | /                                                            | NED 210-250 | /           |
| D5S818     | /                                                 | /                   | JOE 115-160         | /                   | /                   | /                                                            | PET 130-190 | /           |
| Penta E    | /                                                 | /                   | Fluorescein 379-484 | /                   | /                   | /                                                            | /           | /           |
| Penta D    | /                                                 | /                   | JOE 370-454         | /                   | /                   | /                                                            | /           | /           |
